# Supplementary material for: Differentially expressed genes between drought-tolerant and drought-sensitive barley genotypes in response to drought stress during the reproductive stage
Source: PubMed Central journal article supplement — J Exp Bot. 2009 Jun 26;60(12):3531–44. doi: 10.1093/jxb/erp194 (PMC2724701; doi:10.1093/jxb/erp194), 2009-06-26
Supplement: erp194_1.pdf [file erp194_1.pdf]

## Differentially Expressed Genes between Drought Tolerant and Sensitive Barley Genotypes in Response to Drought Stress during the Reproductive Stage.

*Peiguo Guo, Michael Baum, Stefania Grando, Salvatore Ceccarelli, Guihua Bai, Ronghua Li, Maria von Korff, Rajeev K. Varshney, Andreas Graner, Jan Valkoun*

### Supplementary Table S3 Oligonucleotide Sequences Used for Real Time RT-PCR in this Study.

Primers were designed by using Primer Express<sup>TM</sup> 1.5 software (Applied Biosystems, Foster, CA) as the manual instruction. The primer combinations which unambiguously amplified only one desired band in an agarose gel were selected as candidates for real time RT-PCR analysis. The dissociation curve analysis was carried out for each primer pair. The primer combination was used for real-time RT-PCR analysis only when its amplification product had one melting temperature.

| Probe set            | Annotation                                      | Primer sequence (5'→3')                                 |
|----------------------|-------------------------------------------------|---------------------------------------------------------|
| Contig10522_at       | gamma-aminobutyric acid (GABA-A) receptor       | CTACGGCGAAGGTCATGGATAT<br>TGAAGCTCGAGACAACCATACTTTA     |
| Contig11696_at       | putative peptide chain release factor subunit 1 | GAGAACAAGGAGGTGGAGAGAAGA<br>TTCCAACCTCCACATTAAGCTTCAA   |
| Contig1394_s_at      | actin                                           | TCTGTTGACTGTATTGCCGGATTA<br>TTCAGCACCGATCAAATATAGCA     |
| Contig16113_at       | putative protein                                | TAGGATAGAAGAAGGTGTCGGAAAAT<br>AAAACCTCTACCTGCAGCAGCTACA |
| Contig1713_s_at      | dehydrin; DHN4                                  | CACCGTTGCAGAATCAATAATAAGA<br>CATTCGCCCTCCAACAG          |
| Contig19029_at       | bacterial-induced peroxidase precursor          | GAGATCAGGAAAACTGCCATGTC<br>GCACGCCCTGGGTATCG            |
| Contig24415_at       | <none>                                          | ATTTTTGCTCTCGGTCCCAT<br>GCAATAGGGAGCGTATAACACAAG        |
| Contig26204_at       | kaurene synthase                                | GTGGCAAGAATTGCTACGGAATAT<br>TGTCACAACCGCATTTTCTATGTA    |
| Contig3814_at        | delta 1 pyrroline-5-carboxylate synthetase      | TTCTAACCCTCGGTGCATTCTAC<br>CTACCCTCATTGCAAAGGAAGATC     |
| Contig422_at         | chlorophyll a/b-binding protein WCAB precursor  | CTGAGTTGAGAGCTGGCAGGAT<br>GAGAGTGAATGTTGGCAAATCAAA      |
| Contig6539_s_at      | Beta-fructofuranosidase                         | GGGAAGATCTCCTTGAGAAGCTT<br>GCCATGGACGGGTACACTCT         |
| Contig7359_at        | cell death suppressor protein                   | GTGTGGAGACATCACACGAGATC<br>AGTATAAACATGCTGGGACAATCTCA   |
| HVSMEi0006K11r2_s_at | NADP dependent malic enzyme                     | GCTCGGTTGAACATAGTGTAATTTTG<br>GTCGGTCTGCCATTGCAAT       |

Supplementary Figure S1

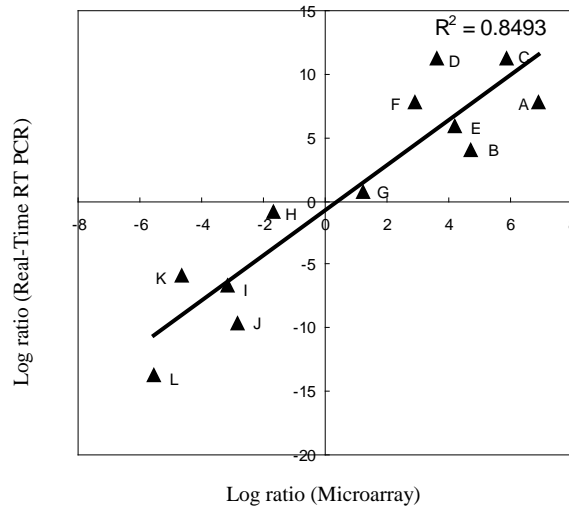

**Supplementary Figure S1** Confirmation of Microarray Data by Real-Time RT-PCR. Correlation analysis of selected data between microarray and real-time RT-PCR experiments. The fold changes in gene expression in response to drought stress were  $\log_2$  transformed. The microarray data  $\log_2$ -values (X-axis) were plotted against the real-time RT-PCR  $\log_2$  values (Y-axis). Letter A to L in the figure represent the contig name of Contig3814\_at, Contig11696\_at, Contig1713\_s\_at, Contig10522\_at, Contig24415\_at, HVSMEi0006K11r2\_s\_at, Contig7359\_at, Contig6539\_s\_at, Contig26204\_at, Contig16113\_at, Contig19029\_at, Contig422\_at, respectively, in Affymetrix barley 1 GeneChip.
